# Supplementary material for: Substorm Expansion Embedded in a Planetary-Scale Auroral Current Cycle
Source: Research Square preprint supplement (doi:10.21203/rs.3.rs-7210582/v1), 2025-08-19
Supplement: Supplementary file 1 [file ec1682b10fd16cc94451cae2.pdf]

# Supplementary Information for “Substorm Expansion Embedded in a Planetary-Scale Auroral Current Cycle”

Tonghui Wang<sup>1,2</sup>, Lei Dai<sup>1\*</sup>, C. Philippe Escoubet<sup>3</sup>,  
Walter Gonzalez<sup>4</sup>, Yong Ren<sup>1</sup>, Minghui Zhu<sup>1</sup>, Shan Wang<sup>5</sup>,  
Chi Wang<sup>1</sup>, Xu Wang<sup>1,2</sup>, Kailai Wang<sup>1,2</sup>, Jinjuan Liu<sup>6</sup>

<sup>1\*</sup>State Key Laboratory of Space Weather, National Space Science  
Center, Chinese Academy of Sciences, Beijing, China.

<sup>2</sup>University of Chinese Academy of Sciences, Chinese Academy of  
Sciences, Beijing, China.

<sup>3</sup>European Space Research and Technology Centre, European Space  
Agency (ESA), Noordwijk, Netherlands.

<sup>4</sup>National Institute for Space Research (INPE), São José dos Campos,  
São Paulo, Brazil.

<sup>5</sup>Institute of Space Physics and Applied Technology, Peking University,  
Beijing, China.

<sup>6</sup>CMA-USTC Laboratory of Fengyun Remote Sensing, University of  
Science and Technology of China, Hefei, China.

\*Corresponding author(s). E-mail(s): [ldai@spaceweather.ac.cn](mailto:ldai@spaceweather.ac.cn);

Figure S1 presents the solar wind conditions and geomagnetic indices associated with a sequence of intense substorms embedded within the main phase of the 17 March 2015 geomagnetic storm. Following 12:00UT, IMF  $B_z$  remains persistently southward, fluctuating around  $-20\text{nT}$  to  $-30\text{nT}$  with brief excursions northward. This prolonged

period of strong southward IMF and fast solar wind drives a series of intense substorms. The first substorm reaches a peak intensity with AL dropping below  $-2000\text{nT}$  around 13:30UT. AL index in the expansion phase of subsequent substorms exhibit minimum values ranging from  $-1300\text{nT}$  to  $-2400\text{nT}$ .

Figure S2, Figure S3, Figure S4 show that the auroral current cycle identified in the main text appear to be common for many intense substorms.

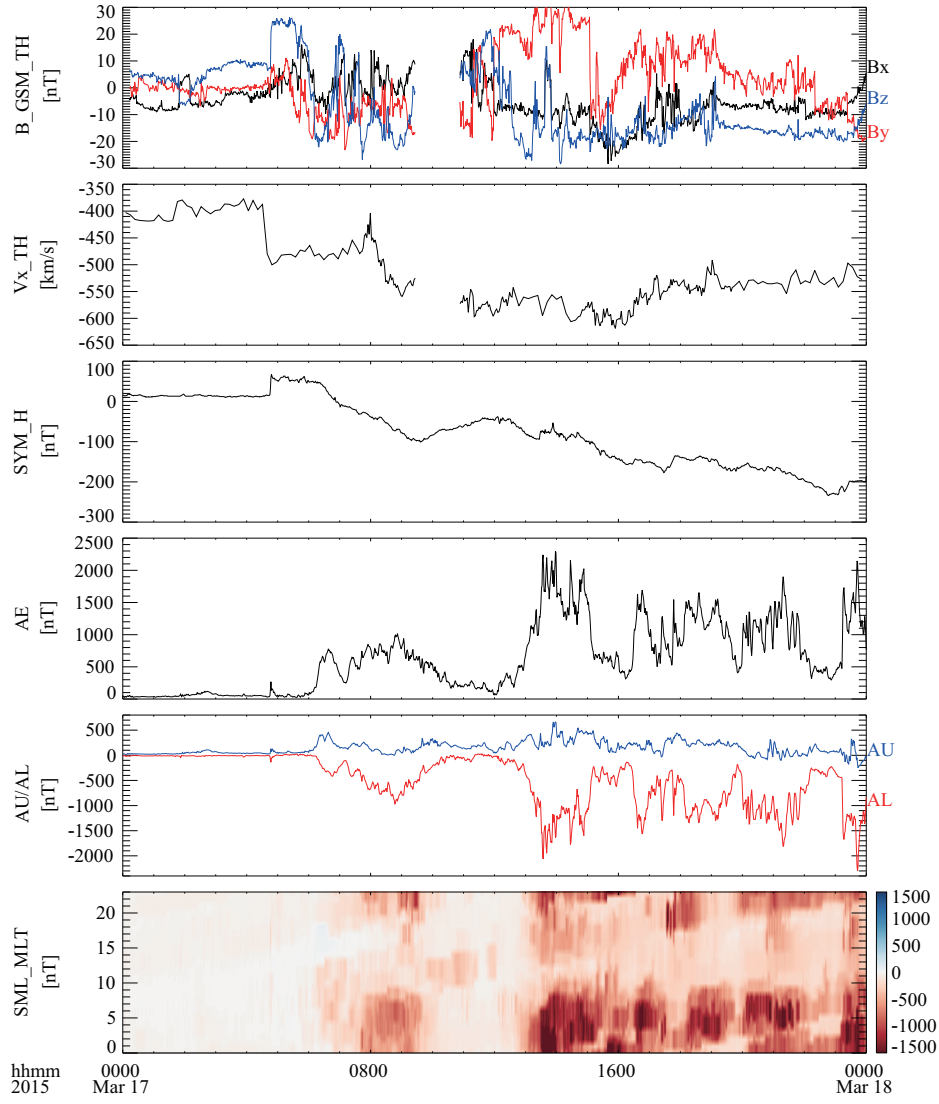

**Fig. S1** Overview of a Series of Intense Substorms During the 17 March 2015 Storm. (a) The interplanetary magnetic field (IMF) in geocentric solar magnetosphere (GSM) coordinate system from THEMIS-B satellite. (b) Solar wind velocity  $V_x$  component in GSM from THEMIS. (c) SYM-H index; (d) AE index. (e) AU (blue) and AL (red) index. (f) The distribution of regional SML index as a function of MLT.

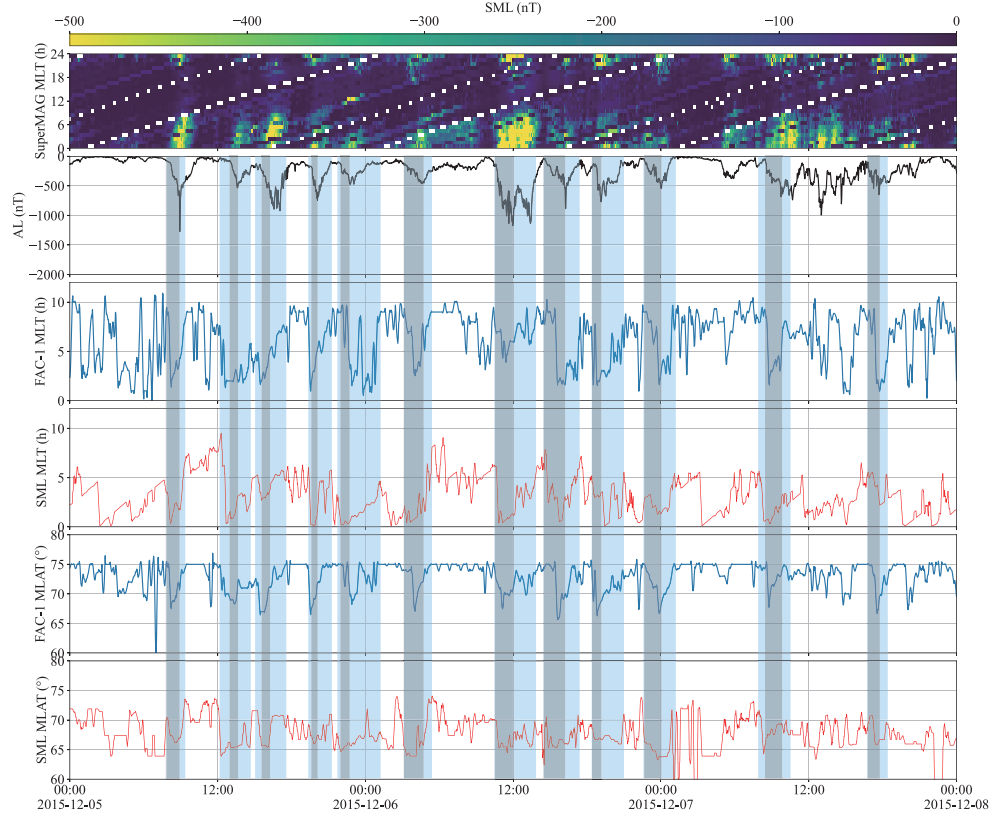

**Fig. S2** Substorm expansions and Auroral Current Cycle from Dec 05, 2015 to Dec 08, 2015. From top to bottom: SML index, Magnetic local time (MLT) location of the peak upward Region 1 FAC and peak westward AEJ on the dawnside. Magnetic latitude (MLAT) location of the peak upward Region 1 FAC and peak westward AEJ on the dawnside. Grey box correspond to substorm expansion phase. Blue boxes correspond to MLT-MLat cycle of aurora currents.

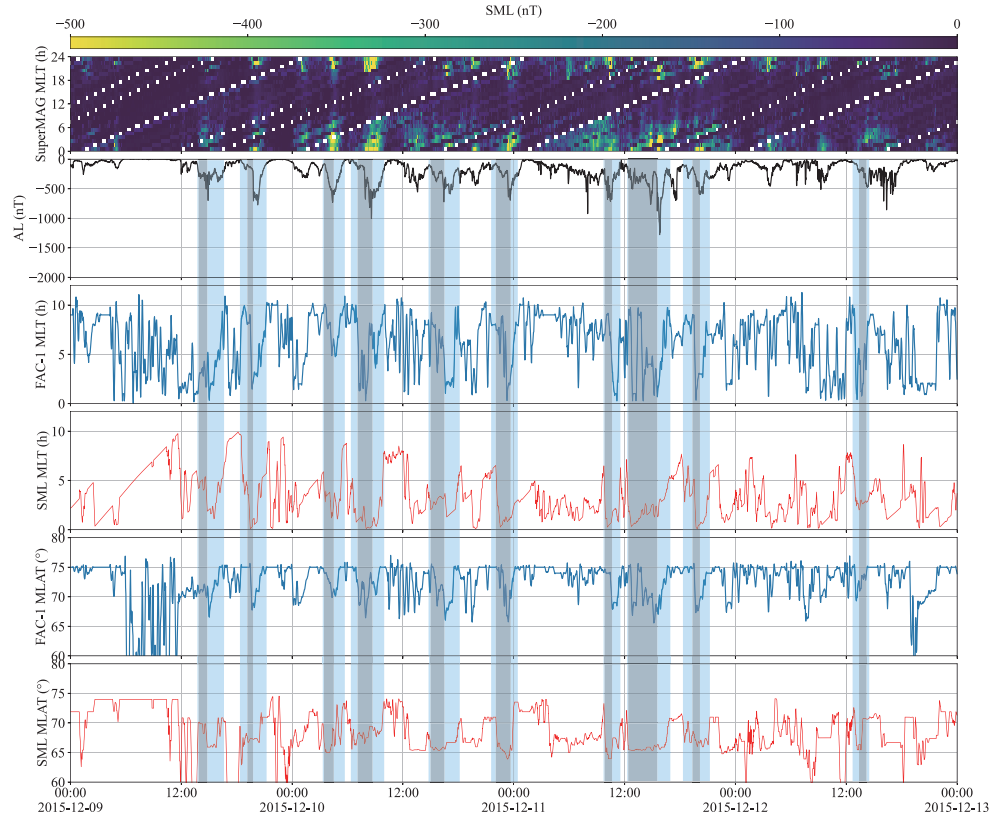

**Fig. S3** Substorm expansions and Auroral Current Cycle from Dec 9, 2015 to Dec 13, 2015. The format is the same as Fig.S2.

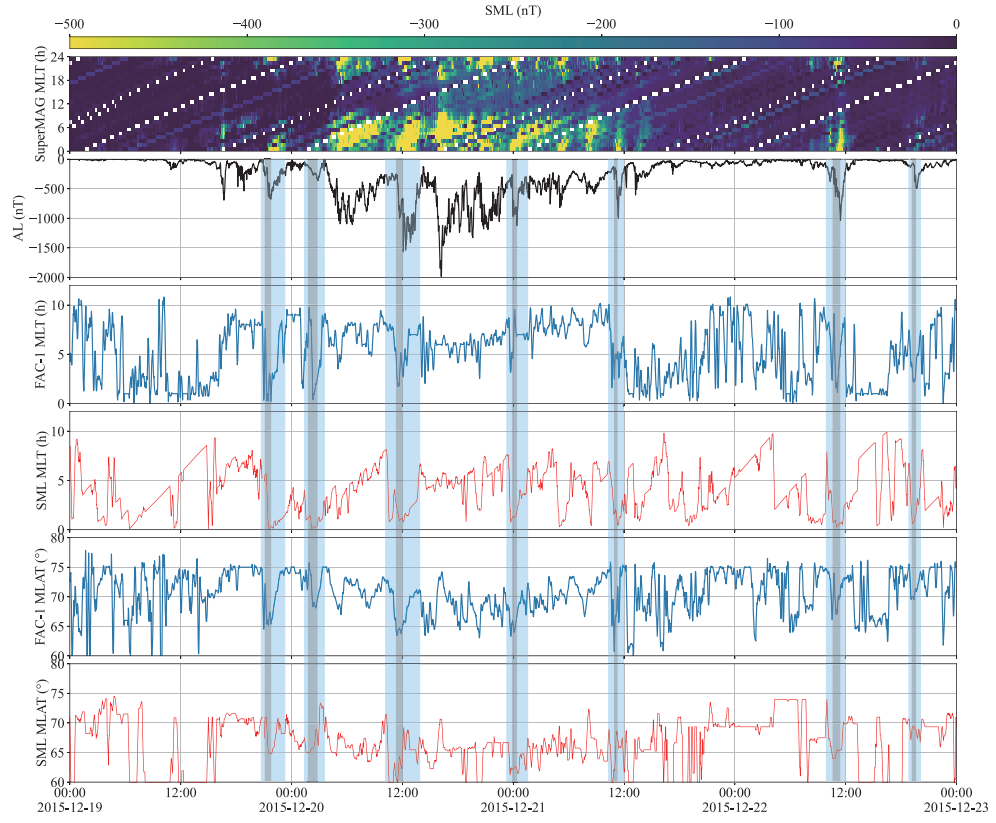

**Fig. S4** Substorm expansions and Auroral Current Cycle from Dec 19, 2015 to Dec 23, 2015. The format is the same as Fig.S2.
